# Supplementary material
Source: PubMed Central journal article supplement (PMC7034369)
Supplement: NIHMS1558433-supplement-1.pdf [file NIHMS1558433-supplement-1.pdf]

363 Supplemental Table 1: Hazard ratios (95% CI) for non-fatal coronary artery disease by frequency of fish intake

|             | Cases/Person-years | Hazard ratio (95% CI) |                   |                   |
|-------------|--------------------|-----------------------|-------------------|-------------------|
| Fish Intake |                    | Crude                 | Model 1           | Model 2           |
| <1/month    | 1,022/65,282       | 1.00                  | 1.00              | 1.00              |
| 1-3/month   | 2,089/132,959      | 1.00 (0.93, 1.08)     | 0.97 (0.90, 1.04) | 1.01 (0.94, 1.09) |
| 1/week      | 2,010/126,697      | 1.01 (0.94, 1.09)     | 0.94 (0.87, 1.01) | 1.03 (0.96, 1.11) |
| 2-4/week    | 967/66,393         | 0.93 (0.85, 1.02)     | 0.89 (0.81, 0.97) | 1.02 (0.93, 1.11) |
| ≥5/week     | 177/11,657         | 0.97 (0.83, 1.14)     | 1.03 (0.88, 1.21) | 1.15 (0.98, 1.35) |
| P-trend     |                    | 0.42                  | 0.87              | 0.09              |

364 Model 1: adjusted for age, sex, and race; Model 2: Model 1 + BMI, education, smoking status, alcohol intake, exercise.

365

366

367 Supplemental Table 2: Hazard ratios (95% CI) for non-fatal ischemic stroke by frequency of fish intake

|             | Cases/Person-years | Hazard ratio (95% CI) |                   |                   |
|-------------|--------------------|-----------------------|-------------------|-------------------|
| Fish Intake |                    | Crude                 | Model 1           | Model 2           |
| <1/month    | 711/93,681         | 1.00                  | 1.00              | 1.00              |
| 1-3/month   | 1,310/191,961      | 0.90 (0.82, 0.99)     | 0.87 (0.79, 0.95) | 0.92 (0.84, 1.00) |
| 1/week      | 1,264/184,591      | 0.90 (0.82, 0.99)     | 0.83 (0.76, 0.91) | 0.93 (0.85, 1.02) |
| 2-4/week    | 637/96,761         | 0.87 (0.78, 0.97)     | 0.81 (0.73, 0.90) | 0.96 (0.86, 1.07) |
| ≥5/week     | 120/16,381         | 0.97 (0.80, 1.17)     | 0.99 (0.82, 1.21) | 1.13 (0.93, 1.38) |
| P-trend     |                    | 0.60                  | 0.70              | 0.16              |

368 Model 1: adjusted for age, sex, and race; Model 2: Model 1 + BMI, education, smoking status, alcohol intake, exercise.

369

370
